# Supplementary material
Source: ML conference proceedings conference paper supplement (https://openreview.net/forum?id=HacSqd6Yw6)
Supplement: supplementary_material [file attachment]

# Supplementary Materials

## SI-BiViT: Binarizing Vision Transformers with Spatial Interaction

Anonymous Authors

### 1. Plugged with existing binarized ViT methods

In the main paper, we evaluated the performance of our Spatial Interaction Module (SI Module) plugged with existing binarized ViT methods on ViT-Small backbones. In this section, we extend our evaluation to more ViT backbones, including DeiT-Tiny and Nest-Tiny. As shown in Table 1, our SI Module exhibits performance improvements on all these backbones. Notably, there is a significant improvement of 10.40% on the DeiT backbone when combined with BiBERT[3]. Overall, SI-MLP improves performance by an average of 5.07%. These results clearly demonstrate the flexibility and effectiveness of SI Module.

**Table 1: Impact of spatial interaction module on existing binarized ViT methods on Tiny-ImageNet. SI module can be directly plugged into prevailing model binarization methods to further improve performance.**

| Model  | Method     | SI Module | Size <sub>(MB)</sub> | Ops <sub>(G)</sub> | Top-1(%)      |
|--------|------------|-----------|----------------------|--------------------|---------------|
| DeiT-T | BiBERT [3] | ✗         | 0.96                 | 0.09               | 26.48         |
|        |            | ✓         | 0.96                 | 0.09               | 36.88(+10.40) |
|        | BiViT [1]  | ✗         | 0.96                 | 0.09               | 37.51         |
|        |            | ✓         | 0.96                 | 0.09               | 40.22(+2.71)  |
|        | Baseline   | ✗         | 1.05                 | 0.09               | 44.11         |
|        |            | ✓         | 1.08                 | 0.09               | 49.80(+5.69)  |
| ViT-S  | BiBERT [3] | ✗         | 1.62                 | 0.15               | 36.65         |
|        |            | ✓         | 1.68                 | 0.15               | 43.15(+6.50)  |
|        | BiViT [1]  | ✗         | 1.62                 | 0.15               | 42.91         |
|        |            | ✓         | 1.68                 | 0.16               | 51.04(+8.13)  |
|        | Baseline   | ✗         | 1.79                 | 0.21               | 53.31         |
|        |            | ✓         | 1.84                 | 0.21               | 58.45(+5.14)  |
| NesT-T | BiBERT [3] | ✗         | 3.77                 | 1.18               | 48.96         |
|        |            | ✓         | 3.79                 | 1.19               | 53.40(+4.44)  |
|        | BiViT [1]  | ✗         | 3.77                 | 1.18               | 55.63         |
|        |            | ✓         | 3.79                 | 1.19               | 56.11(+0.48)  |
|        | Baseline   | ✗         | 3.77                 | 1.18               | 57.90         |
|        |            | ✓         | 3.79                 | 1.19               | 60.00(+2.10)  |

### 2. Effect of expansion ratio in MLP module

Our dual branch consists of an MLP module and an SI module. To address efficiency concerns, we reduce the size of the MLP module. The Multi-Layer Perceptron (MLP) is composed of two linear layers: one expands the dimension, and another reduces it back to the original size. By adjusting the expansion ratio, we can control the size of the MLP. Initially, the expansion ratio is set to 4 by default. In stage 1, we apply knowledge distillation to the MLP module, enabling a smaller MLP without significant performance degradation. In stage 2, we introduce our SI module to enhance spatial interaction. As illustrated in Table 2, when the expansion ratio is set to 1 on the ViT-S backbone, the model struggles to

retain knowledge from full precision counterparts, resulting in a performance of only 51.80% at stage 1. Since the parameters in stage 2 are initialized based on stage 1, it inevitably leads to a low performance of 54.70%. Conversely, maintaining the expansion ratio at 4 yields the highest performance at stage 1 (58.50%), but due to limited spatial interaction, it degrades significantly in stage 2 (53.53%). Similar trends can be observed with the Swin-T backbone. Overall, setting the expansion ratio to 3 strikes a balance between preserving knowledge in stage 1 and enhancing spatial interaction in stage 2.

**Table 2: Performance comparison with different expansion ratios of MLP module. ‘SIC’ denotes Spatial Interaction Capability.**

| Models | Expand-ratio | SIC(times) | Top-1(%) |         |
|--------|--------------|------------|----------|---------|
|        |              |            | Stage-1  | Stage-2 |
| ViT-S  | 1            | 7          | 51.80    | 54.70   |
|        | 2            | 5          | 56.22    | 57.65   |
|        | 3            | 3          | 56.12    | 58.45   |
|        | 4            | 1          | 58.50    | 53.31   |
| Swin-T | 1            | 7          | 60.05    | 61.67   |
|        | 2            | 5          | 63.06    | 63.19   |
|        | 3            | 3          | 64.07    | 64.29   |
|        | 4            | 1          | 64.32    | 64.22   |

### 3. Implementation of Dual-Branch

Our proposed dual-branch approach is straightforward to implement and can be seamlessly integrated into existing training pipelines. We directly replace the vanilla MLP module with it. Below is a simplified implementation using PyTorch [2]. The full implementation code will be made publicly available.

```
1 class SI_Module(nn.Module):
2     def __init__(self, dim_mlp, ratio_mlp, dim_spatial,
3         ratio_spatial):
4         super(SI_Module, self).__init__()
5         # MLP module
6         self.norm1 = nn.BatchNorm1d(dim_spatial)
7         self.mlp = Mlp1w1a(
8             in_features=dim_mlp,
9             hidden_features=int(dim_mlp * ratio_mlp),
10         )
11         # SI module
12         self.norm2 = nn.BatchNorm1d(dim_mlp)
13         self.spatial = Mlp1w1a(
14             in_features=dim_spatial,
15             hidden_features=int(dim_spatial *
16                 ratio_spatial),
17         )
18         # channel-wise balancing factor
19         self.learnablescale = nn.Parameter(torch.zeros
20             (1,1,dim_mlp), requires_grad=True)
```

|     |    |                                                   |
|-----|----|---------------------------------------------------|
| 117 | 18 |                                                   |
| 118 | 19 | def forward(self, x):                             |
| 119 | 20 | x1 = self.mlp(self.norm1(x))                      |
| 120 | 21 | x2 = self.spatial(self.norm2(x.transpose(1, 2))). |
| 121 | 22 | transpose(1, 2)                                   |
| 122 | 23 | x = x1 + self.learnablescale * x2                 |
| 123 |    | return x                                          |
| 124 |    |                                                   |
| 125 |    |                                                   |
| 126 |    |                                                   |
| 127 |    |                                                   |
| 128 |    |                                                   |
| 129 |    |                                                   |
| 130 |    |                                                   |
| 131 |    |                                                   |
| 132 |    |                                                   |
| 133 |    |                                                   |
| 134 |    |                                                   |
| 135 |    |                                                   |
| 136 |    |                                                   |
| 137 |    |                                                   |
| 138 |    |                                                   |
| 139 |    |                                                   |
| 140 |    |                                                   |
| 141 |    |                                                   |
| 142 |    |                                                   |
| 143 |    |                                                   |
| 144 |    |                                                   |
| 145 |    |                                                   |
| 146 |    |                                                   |
| 147 |    |                                                   |
| 148 |    |                                                   |
| 149 |    |                                                   |
| 150 |    |                                                   |
| 151 |    |                                                   |
| 152 |    |                                                   |
| 153 |    |                                                   |
| 154 |    |                                                   |
| 155 |    |                                                   |
| 156 |    |                                                   |
| 157 |    |                                                   |
| 158 |    |                                                   |
| 159 |    |                                                   |
| 160 |    |                                                   |
| 161 |    |                                                   |
| 162 |    |                                                   |
| 163 |    |                                                   |
| 164 |    |                                                   |
| 165 |    |                                                   |
| 166 |    |                                                   |
| 167 |    |                                                   |
| 168 |    |                                                   |
| 169 |    |                                                   |
| 170 |    |                                                   |
| 171 |    |                                                   |
| 172 |    |                                                   |
| 173 |    |                                                   |
| 174 |    |                                                   |

REFERENCES

[1] Yefei He, Zhenyu Lou, Luoming Zhang, Jing Liu, Weijia Wu, Hong Zhou, and Bohan Zhuang. 2023. BiViT: Extremely Compressed Binary Vision Transformers. In *IEEE International Conference on Computer Vision*. 5651–5663.

[2] Adam Paszke, Sam Gross, Francisco Massa, Adam Lerer, James Bradbury, Gregory Chanan, Trevor Killeen, Zeming Lin, Natalia Gimelshein, Luca Antiga, et al. 2019. Pytorch: An imperative style, high-performance deep learning library. *Advances in Neural Information Processing Systems* 32 (2019).

[3] Haotong Qin, Yifu Ding, Mingyuan Zhang, Qinghua Yan, Aishan Liu, Qingqing Dang, Ziwei Liu, and Xianglong Liu. 2022. Bibert: Accurate fully binarized bert. *arXiv preprint arXiv:2203.06390* (2022).

|     |
|-----|
| 175 |
| 176 |
| 177 |
| 178 |
| 179 |
| 180 |
| 181 |
| 182 |
| 183 |
| 184 |
| 185 |
| 186 |
| 187 |
| 188 |
| 189 |
| 190 |
| 191 |
| 192 |
| 193 |
| 194 |
| 195 |
| 196 |
| 197 |
| 198 |
| 199 |
| 200 |
| 201 |
| 202 |
| 203 |
| 204 |
| 205 |
| 206 |
| 207 |
| 208 |
| 209 |
| 210 |
| 211 |
| 212 |
| 213 |
| 214 |
| 215 |
| 216 |
| 217 |
| 218 |
| 219 |
| 220 |
| 221 |
| 222 |
| 223 |
| 224 |
| 225 |
| 226 |
| 227 |
| 228 |
| 229 |
| 230 |
| 231 |
| 232 |
